# Supplementary material for: Inflammatory-Targeted Lipid Carrier as a New Nanomaterial to Formulate an Inhaled Drug Delivery System
Source: MDPI journal article supplement (doi:10.3390/molecules29071616), 2024-04-03
Supplement: s1 [file s1]

*Supplementary material*

**Inflammatory-targeted lipid carrier as a new nanomaterial to formulate an  
inhaled drug delivery system**

Eleonora Maretti, Federica Gioia, Cecilia Rustichelli, Susanna Molinari and Eliana Leo\*

Department of Life Sciences, University of Modena and Reggio Emilia, via G. Campi 103,  
41125, Modena, Italy

*\*corresponding author: Eliana Leo, Department of Life Sciences, Via Campi, 103, 41125  
Modena, Italy, tel \*39 59 2055885; email: [eliana.leo@unimore.it](mailto:eliana.leo@unimore.it)*

**Table S1.** Summary of preliminary samples prepared with different ratio between the lipid components. Size and polydispersity index (PDI)

| <b>PEA, stearic acid and<br/>cholesteryl stearate<br/>(weight ratio)</b> | <b>Size<br/>(nm <math>\pm</math> SD)</b> | <b>PDI</b>        |
|--------------------------------------------------------------------------|------------------------------------------|-------------------|
| 1 : 0.5 : 0.5                                                            | 568 $\pm$ 43                             | 0.524 $\pm$ 0.143 |
| 1 : 1 : 1                                                                | 430 $\pm$ 20                             | 0.362 $\pm$ 0.015 |
| 1 : 2 : 1                                                                | 388 $\pm$ 1                              | 0.306 $\pm$ 0.052 |
| 1 : 2 : 2                                                                | 305 $\pm$ 11                             | 0.285 $\pm$ 0.043 |
| 1 : 2.6 : 2                                                              | 253 $\pm$ 15                             | 0.185 $\pm$ 0.100 |

**Table S2.** Simulated Lung Fluid (SLF) at pH 7.4 salt composition.

| <b>Components</b>                      | <b>g/l</b> |
|----------------------------------------|------------|
| Magnesium chloride hexahydrate         | 0.2033     |
| Sodium chloride                        | 6.0193     |
| Potassium chloride                     | 0.2982     |
| Sodium sulphate anhydrous              | 0.071      |
| Calcium chloride dihydrate             | 0.3676     |
| Sodium acetate trihydrate              | 0.9526     |
| Sodium hydrogen carbonate              | 2.6043     |
| Sodium citrate dihydrate               | 0.097      |
| Sodium phosphate monobasic monohydrate | 0.142      |
